# Supplementary material for: Skin adhesion to the percutaneous component of direct bone anchored systems: systematic review on preclinical approaches and biomaterials
Source: Royal Society of Chemistry journal article supplement (doi:10.1039/d1bm00707f), 2021-01-01
Supplement: d1bm00707f1.pdf [file d1bm00707f1.pdf]

## **Appendix A**

Details of the search strategies as performed in April 2020.

1 - Database: Medline (Pubmed)

Search period: 2010/04/28-2020/04/24

Date of search:2020/04/28

**Search:** (((((transcutaneous device) OR (percutaneous device) OR (transcutaneous implant) OR (percutaneous implant) AND (skin integration) OR (skin sealing) Filters: Full text, in the last 10 years, English

(((((("transcutaneous"[All Fields] OR "transcutaneously"[All Fields]) AND ((((((("device s"[All Fields] OR "equipment and supplies"[MeSH Terms]) OR ("equipment"[All Fields] AND "supplies"[All Fields])) OR "equipment and supplies"[All Fields]) OR "device"[All Fields]) OR "instrumentation"[MeSH Subheading]) OR "instrumentation"[All Fields]) OR "devices"[All Fields])) OR (((("percutaneous"[All Fields] OR "percutaneously"[All Fields]) OR "percutaneous"[All Fields]) AND ((((((("device s"[All Fields] OR "equipment and supplies"[MeSH Terms]) OR ("equipment"[All Fields] AND "supplies"[All Fields])) OR "equipment and supplies"[All Fields]) OR "device"[All Fields]) OR "instrumentation"[MeSH Subheading]) OR "instrumentation"[All Fields]) OR "devices"[All Fields]))) OR ("transcutaneous"[All Fields] OR "transcutaneously"[All Fields]) AND (((((((((((((((((((("embryo implantation"[MeSH Terms] OR ("embryo"[All Fields] AND "implantation"[All Fields])) OR "embryo implantation"[All Fields]) OR "implantation"[All Fields]) OR "implant"[All Fields]) OR "implant s"[All Fields]) OR "implantability"[All Fields]) OR "implantable"[All Fields]) OR "implantables"[All Fields]) OR "implantate"[All Fields]) OR "implantated"[All Fields]) OR "implantates"[All Fields]) OR "implantations"[All Fields]) OR "implanted"[All Fields]) OR "implanter"[All Fields]) OR "implanters"[All Fields]) OR "implanting"[All Fields]) OR "implantion"[All Fields]) OR "implantitis"[All Fields]) OR "implants"[All Fields])))) OR (((("percutaneous"[All Fields] OR "percutaneously"[All Fields]) OR "percutaneous"[All Fields]) AND (((((((((((((((((((("embryo implantation"[MeSH Terms] OR ("embryo"[All Fields] AND "implantation"[All Fields])) OR "embryo implantation"[All Fields]) OR "implantation"[All Fields]) OR "implant"[All Fields]) OR "implant s"[All Fields]) OR "implantability"[All Fields]) OR "implantable"[All Fields]) OR "implantables"[All Fields]) OR "implantate"[All Fields]) OR "implantated"[All Fields]) OR "implantates"[All Fields]) OR "implantations"[All Fields]) OR "implanted"[All Fields]) OR "implanter"[All Fields]) OR "implanters"[All Fields]) OR "implanting"[All Fields]) OR "implantion"[All Fields]) OR "implantitis"[All Fields]) OR "implants"[All Fields])))) AND (((("skin"[MeSH Terms] OR "skin"[All Fields]) AND (((((((((((((((((((("integrability"[All Fields] OR "integrable"[All Fields]) OR "integral"[All Fields]) OR "integrally"[All Fields]) OR "integrals"[All Fields]) OR "integrant"[All Fields]) OR "integrants"[All Fields]) OR "integrate"[All Fields]) OR "integrated"[All Fields]) OR "integrates"[All Fields]) OR "integrating"[All Fields]) OR "integration"[All Fields]) OR "integrational"[All Fields]) OR "integrations"[All Fields]) OR "integrative"[All Fields]) OR "integratively"[All Fields]) OR "integrator"[All Fields]) OR "integrators"[All Fields])))) OR ("skin"[MeSH Terms] OR "skin"[All Fields]) AND ("sealed"[All Fields] OR "sealing"[All Fields]) OR "sealings"[All Fields]))

### **Translations**

**transcutaneous:** "transcutaneous"[All Fields] OR "transcutaneously"[All Fields]

device: "device's"[All Fields] OR "equipment and supplies"[MeSH Terms] OR ("equipment"[All Fields] AND "supplies"[All Fields]) OR "equipment and supplies"[All Fields] OR "device"[All Fields] OR "instrumentation"[Subheading] OR "instrumentation"[All Fields] OR "devices"[All Fields]

**percutaneous:** "percutaneous"[All Fields] OR "percutaneously"[All Fields] OR "percutaneous"[All Fields]

**device:** "device's"[All Fields] OR "equipment and supplies"[MeSH Terms] OR ("equipment"[All Fields] AND "supplies"[All Fields]) OR "equipment and supplies"[All Fields] OR "device"[All Fields] OR "instrumentation"[Subheading] OR "instrumentation"[All Fields] OR "devices"[All Fields]

**transcutaneous:** "transcutaneous"[All Fields] OR "transcutaneously"[All Fields]

**implant:** "embryo implantation"[MeSH Terms] OR ("embryo"[All Fields] AND "implantation"[All Fields]) OR "embryo implantation"[All Fields] OR "implantation"[All Fields] OR "implant"[All Fields] OR "implant's"[All Fields] OR "implantability"[All Fields] OR "implantable"[All Fields] OR "implantables"[All Fields] OR "implantate"[All Fields] OR "implantated"[All Fields] OR "implantates"[All Fields] OR "implantations"[All Fields] OR "implanted"[All Fields] OR "implanter"[All Fields] OR "implanters"[All Fields] OR "implanting"[All Fields] OR "implantion"[All Fields] OR "implantitis"[All Fields] OR "implants"[All Fields]

**percutaneous:** "percutaneous"[All Fields] OR "percutaneously"[All Fields] OR "percutaneous"[All Fields]

**implant:** "embryo implantation"[MeSH Terms] OR ("embryo"[All Fields] AND "implantation"[All Fields]) OR "embryo implantation"[All Fields] OR "implantation"[All Fields] OR "implant"[All Fields] OR "implant's"[All Fields] OR "implantability"[All Fields] OR "implantable"[All Fields] OR "implantables"[All Fields] OR "implantate"[All Fields] OR "implantated"[All Fields] OR "implantates"[All Fields] OR "implantations"[All Fields] OR "implanted"[All Fields] OR "implanter"[All Fields] OR "implanters"[All Fields] OR "implanting"[All Fields] OR "implantion"[All Fields] OR "implantitis"[All Fields] OR "implants"[All Fields]

**skin:** "skin"[MeSH Terms] OR "skin"[All Fields]

**integration:** "integrability"[All Fields] OR "integrable"[All Fields] OR "integral"[All Fields] OR "integrally"[All Fields] OR "integrals"[All Fields] OR "integrant"[All Fields] OR "integrants"[All Fields] OR "integrate"[All Fields] OR "integrated"[All Fields] OR "integrates"[All Fields] OR "integrating"[All Fields] OR "integration"[All Fields] OR "integrational"[All Fields] OR "integrations"[All Fields] OR "integrative"[All Fields] OR "integratively"[All Fields] OR "integrator"[All Fields] OR "integrators"[All Fields]

**skin:** "skin"[MeSH Terms] OR "skin"[All Fields]

**sealing:** "sealed"[All Fields] OR "sealing"[All Fields] OR "sealings"[All Fields]

(transcutaneous[All Fields] AND ("equipment and supplies"[MeSH Terms] OR ("equipment"[All Fields] AND "supplies"[All Fields]) OR "equipment and supplies"[All

Fields] OR "device"[All Fields])) OR (percutaneous[All Fields] AND ("equipment and supplies"[MeSH Terms] OR ("equipment"[All Fields] AND "supplies"[All Fields]) OR "equipment and supplies"[All Fields] OR "device"[All Fields])) OR (transcutaneous[All Fields] AND implant[All Fields]) OR (percutaneous[All Fields] AND implant[All Fields]) AND (("skin"[MeSH Terms] OR "skin"[All Fields]) AND ("Integration"[Journal] OR "Integration (Amst)"[Journal] OR "integration"[All Fields])) OR (("skin"[MeSH Terms] OR "skin"[All Fields]) AND sealing[All Fields]) AND ("loattrfull text"[sb] AND "2010/04/28"[PDat] : "2020/04/24"[PDat] AND English[lang])

## 2 - Database: Web of Knowledge

Search period: 2010/04/28-2020/04/24

Date of search:2020/04/28

TS=("transcutaneous device" OR "percutaneous device" OR "transcutaneous implant" OR "percutaneous implant" AND "skin integration" OR "skin sealing")

Refined by: DOCUMENT TYPES: ( ARTICLE ) AND LANGUAGES: ( ENGLISH )

Timespan: 2010-2020. Indexes: SCI-EXPANDED, SSCI, A&HCI, CPCI-S, CPCI-SSH, ESCI.

## 3 - Database: Scopus

Search period: 2010/04/28-2020/04/24

Date of search:2020/04/28

(ALL ( "transcutaneous device" ) OR ALL ( "percutaneous device" ) OR ALL ( "transcutaneous implant" ) OR ALL ( "percutaneous implant" ) AND ALL ( "skin integration" ) OR TITLE-ABS-KEY ( "skin sealing" ) ) AND DOCTYPE ( ar ) AND PUBYEAR > 2010 AND PUBYEAR < 2020
