# Supplementary material for: Skin adhesion to the percutaneous component of direct bone anchored systems: systematic review on preclinical approaches and biomaterials
Source: Royal Society of Chemistry journal article supplement (doi:10.1039/d1bm00707f), 2021-01-01
Supplement: d1bm00707f3.pdf [file d1bm00707f3.pdf]

**Supplementary Table 1.** Summary of the *in vitro* studies included in the systematic review

| TESTED MATERIALS                                                                                                                                                                                                                                         | CELL TYPE                      | PERFORMED TESTS and EXPERIMENTAL TIMES                                                                                                                                                                                                                                                                       | MAIN OUTCOME                                                                                                                                                                                                                                                                                                                                                                                                                                                                                                                                                                                                                                                                                                                                                                                                                                                                                                                | MAIN CONCLUSION                                                          | REF         |
|----------------------------------------------------------------------------------------------------------------------------------------------------------------------------------------------------------------------------------------------------------|--------------------------------|--------------------------------------------------------------------------------------------------------------------------------------------------------------------------------------------------------------------------------------------------------------------------------------------------------------|-----------------------------------------------------------------------------------------------------------------------------------------------------------------------------------------------------------------------------------------------------------------------------------------------------------------------------------------------------------------------------------------------------------------------------------------------------------------------------------------------------------------------------------------------------------------------------------------------------------------------------------------------------------------------------------------------------------------------------------------------------------------------------------------------------------------------------------------------------------------------------------------------------------------------------|--------------------------------------------------------------------------|-------------|
| <i>CELLs FROM SKIN ORIGIN</i>                                                                                                                                                                                                                            |                                |                                                                                                                                                                                                                                                                                                              |                                                                                                                                                                                                                                                                                                                                                                                                                                                                                                                                                                                                                                                                                                                                                                                                                                                                                                                             |                                                                          |             |
| <p>Medical grade poly (<math>\epsilon</math>-caprolactone) scaffold realized with melt electrowriting (MEW) technique in comparison with:</p> <ul style="list-style-type: none"> <li>- un-seeded tubular scaffolds</li> <li>- solid PCL tubes</li> </ul> | Human dermal fibroblasts (HDF) | <p>Confocal laser scanning microscope and SEM at 4 days;</p> <p>Cell viability at 4 days;</p> <p>Cell proliferation at 4 and 7 days.</p> <p>Histological evaluation after insertion in reconstructed Human Skin Equivalent models at 3, 7 and 12 days</p> <p>Pullout testing 12 days after HSE insertion</p> | <p>Cells elongation and sheet formation after 4 days</p> <p>90% of cells viability and increasing proliferation values from 4 to 7 days.</p> <p>Different epidermal growth patterns around the PCL samples:</p> <p>At day 3, 2 solid PCL out of 4 samples exhibited epidermal downgrowth. At day 7, 3 out of 4 samples exhibited epidermal downgrowth and at day 12, 4 out of 6 samples exhibited epidermal downgrowth.</p> <p>All un-seeded samples exhibited epithelial downgrowth at all-time points;</p> <p>The majority of the pre-seeded samples exhibited epithelial up-growth: at day 3, 3 out of 5 samples exhibited signs of epidermal up-growth, 6 out of 6 at day 7 and 3 out of 5 at Day 12.</p> <p>Pre-seeded and un-seeded implants exhibited similar mean maximum pullout forces of <math>0.498 \text{ N} \pm 0.067 \text{ N}</math> and <math>0.538 \text{ N} \pm 0.055 \text{ N}</math>, respectively</p> | MEW technique is useful to modified surface encouraging skin integration | Bolle, 2020 |

|                                                                                                                                                                                                                                                                                                                                                                                                                                                                                                                                      |                                                           |                                                                                                                           |                                                                                                                                                                                                                                                                                                                                                                                                                                                                                                                                                                                                                     |                                                                                                                                                                                                                                                                                                                                                                                                                                 |              |
|--------------------------------------------------------------------------------------------------------------------------------------------------------------------------------------------------------------------------------------------------------------------------------------------------------------------------------------------------------------------------------------------------------------------------------------------------------------------------------------------------------------------------------------|-----------------------------------------------------------|---------------------------------------------------------------------------------------------------------------------------|---------------------------------------------------------------------------------------------------------------------------------------------------------------------------------------------------------------------------------------------------------------------------------------------------------------------------------------------------------------------------------------------------------------------------------------------------------------------------------------------------------------------------------------------------------------------------------------------------------------------|---------------------------------------------------------------------------------------------------------------------------------------------------------------------------------------------------------------------------------------------------------------------------------------------------------------------------------------------------------------------------------------------------------------------------------|--------------|
|                                                                                                                                                                                                                                                                                                                                                                                                                                                                                                                                      |                                                           |                                                                                                                           | Solid PCL exhibit a ↓ maximum pullout force of $0.076 \text{ N} \pm 0.032 \text{ N}$ .                                                                                                                                                                                                                                                                                                                                                                                                                                                                                                                              |                                                                                                                                                                                                                                                                                                                                                                                                                                 |              |
| <p>Silicon surface coated with Ti nanocoating further immersed in a polydopamine coating.</p> <p>Four study group:</p> <ul style="list-style-type: none"> <li>- milli-Q water storing (PDA);</li> <li>- protein A incubation prior to the functionalization with the extracellular domain of human E-cadherin fused with the Fc domain of human IgG producing an alignment orientation (ProtA-EcadFc);</li> <li>- direct incubation with EcadFc in a random orientation;</li> <li>- incubation with fibronectin (PDA-FN).</li> </ul> | HaCaT cells (keratinocytes) and primary dermal fibroblast | <p>Adhesion and Proliferation at 4, 24 and 48 hrs</p> <p>Migration test for 24 hrs</p>                                    | <p>HaCaTs adhesion and spreading on all surfaces with no differences in cell numbers at 4 hrs.</p> <p>↑ HaCaT on PDA-FN vs PDA. at 24 hrs</p> <p>↑ HaCaT on PDA-FN vs protA-EcadFc at 48 hrs</p> <p>No proliferation at 48 hrs on PDA and PDA-protA-EcadFc.</p> <p>↓ cell area for PDA-protA-EcadFc vs other coatings at 4 hrs</p> <p>↑ cell area for PDA-protA-EcadFc, at 24- and 48 hrs vs PDA-FN at 48 hrs.</p> <p>↑ migration rate for PDA-FN substrates and ↓ for PDA-protA-EcadFc at 24 hrs.</p> <p>↓ adhesion of fibroblast on PDA-protA-EcadFc substrate, while ↑ adhesion for PDA and PDA-FN at 4 hrs.</p> | <p>HaCaTs attached to the surfaces even if a decrease in cells proliferation and increase in cell size was present on aligned surfaces (ProtA-EcadFc).</p> <p>The aligned E-cadherin surface was non-adhesive for primary human dermal fibroblasts.</p> <p>E-cadherin functionalization could be useful in percutaneous implants to ensure epidermal attachment, limit epidermal downgrowth and prevent fibroblast adhesion</p> | Dehli, 2019  |
| Ti discs (grade 2) and grade 1 Ti film as control material vs materials submitted to two different alkali-heat (AH) treatments (5 or 10 M AH treatment) in order to realized nano-topographic (nano-spike and nano-pores) surfaces                                                                                                                                                                                                                                                                                                   | HDF                                                       | <p>Cellular morphology and adhesion at 1 day</p> <p>Cells viability at 1 and 7 days</p> <p>Gene expression at 14 days</p> | <p>Fibroblasts onto machined surface were spindle shapes with well-developed and unidirectional actin formation and lamellipodia;</p> <p>Fibroblast on 5M AH- were small but with spotty/circular actin accumulation inside and</p>                                                                                                                                                                                                                                                                                                                                                                                 | The nano-topographies of the AH-treated surfaces were able to stimulate fibroblast adhesion, proliferation and ECM production.                                                                                                                                                                                                                                                                                                  | Yamada, 2016 |

|                                                                                 |                                                                                                                                                                                        |                                                                                                                                                  |                                                                                                                                                                                                                                                                                                                                                                                                                                                                                                                                                                                                                                          |                                                                                                                                                                                                                                                        |                  |
|---------------------------------------------------------------------------------|----------------------------------------------------------------------------------------------------------------------------------------------------------------------------------------|--------------------------------------------------------------------------------------------------------------------------------------------------|------------------------------------------------------------------------------------------------------------------------------------------------------------------------------------------------------------------------------------------------------------------------------------------------------------------------------------------------------------------------------------------------------------------------------------------------------------------------------------------------------------------------------------------------------------------------------------------------------------------------------------------|--------------------------------------------------------------------------------------------------------------------------------------------------------------------------------------------------------------------------------------------------------|------------------|
|                                                                                 |                                                                                                                                                                                        | <p>Collagen production at 28 days</p> <p>Inflammatory cytokines detection at 3 days</p> <p>SEM at 28 days</p>                                    | <p>at the edge of the cells.</p> <p>On 10 M AH, cells were rectangular, spindle, or oval shapes with a cytoskeletal network with multiple orientations, and actin accumulation.</p> <p>↓ Cell viability on treated surfaces vs the machined ones at day 1, non-differences at day 4.</p> <p>↑ collagen deposition on treated surfaces (fold 1.2 for 5 M and 1.7 for 10 M) vs machined surfaces</p> <p>↑ up-regulation of COL1 and 3, FBN and ELN on treated surfaces vs machined</p> <p>no differences among surfaces for cytokines levels (GM-CSF, IFN-<math>\gamma</math>, IL-1<math>\beta</math>, -6 and -8, MCP-1 and -3, M-CSF)</p> |                                                                                                                                                                                                                                                        |                  |
| <p>Ti Nano-tubed (TNT) obtained with anodization vs polished Titanium (pTi)</p> | <p>Human epidermal keratinocytes (HaCat) and human dermal fibroblasts (HDF) used in 5 experimental groups:<br/>1) HaCat (K) cells seeded on TNT or pTi surfaces.<br/>2) F: HDF (F)</p> | <p>Cells proliferation and morphology at 1, 3 and 7 day</p> <p>Gene expression at 4, 24 and 72 hrs</p> <p>Immunofluorescence assay at 7 days</p> | <p>↑ viability of HaCat cells at 3 and 7 days in single culture on pTi vs HaCat cells cultured on TNT.</p> <p>↓ proliferative activity in group 3 especially onto pTi at 7 days vs single cultures.</p> <p>HaCat appeared cuboidal, non-elongated and aggregated on the surfaces.</p> <p>↑ HaCat adhesion on pTi surface than TNT at 7 days</p>                                                                                                                                                                                                                                                                                          | <p>Better orientation of HSF cells on the TNT and decreased adhesion and proliferation of HaCat.</p> <p>The TNT surface was beneficial to the fibroblasts, but unsatisfactory for keratinocytes in both single culture and non-contact co-culture.</p> | <p>Tan, 2017</p> |

|                                                        |                                                                                                                                                                                                                                                                                                                                                                                                                                        |                            |                                                                                                                                                                                                                                                                                                                                                                                                                                                                                                                                                                                                                                                                                                                                                                                                                                                      |                                        |                              |
|--------------------------------------------------------|----------------------------------------------------------------------------------------------------------------------------------------------------------------------------------------------------------------------------------------------------------------------------------------------------------------------------------------------------------------------------------------------------------------------------------------|----------------------------|------------------------------------------------------------------------------------------------------------------------------------------------------------------------------------------------------------------------------------------------------------------------------------------------------------------------------------------------------------------------------------------------------------------------------------------------------------------------------------------------------------------------------------------------------------------------------------------------------------------------------------------------------------------------------------------------------------------------------------------------------------------------------------------------------------------------------------------------------|----------------------------------------|------------------------------|
|                                                        | <p>cells seeded on TNT or pTi surfaces.</p> <p>3) K/F: HaCat cells on material surfaces non-contact co-cultured with HDF cells.</p> <p>4) F/K: HDF cells on material surface were non-contact co-cultured with HaCat cells. HDF cells were seeded on TNT or pTi surface, and then HaCat cells were seeded on the transwell.</p> <p>5) Co: The two types of cells were contact co-cultured on material surfaces (contact cultures).</p> |                            | <p>and ↓ in group 3 onto both pTi and TNT</p> <p>↑ expression level of laminin-β3 by HaCat cells and Collagen IVα-1 for both cell type in single culture on the pTi surface vs TNT;</p> <p>↓ laminin- β3 on TNT and pTi surfaces in group 4 and ↓ level of collagen IVα-1 in HaCat cells on TNT in group 3 vs single culture.</p> <p>↑ HDF cell density in single culture on TNT surface vs pTi at 3 and 7 days and also in group 4.</p> <p>↑ proliferative activity of HSF cells in group 4 vs single cultures.</p> <p>HDF morphology was elongated and spindle-like shape at 7 d.</p> <p>↑ HDF adhesion on TNT surface and better orientation in group 4</p> <p>↑ TGF-β1 and Collagen IVα-1 expression by HDF cells in single cultures and in group 3 on TNT surface vs pTi.</p> <p>↑ collagen I and collagen IV expression by HDF in group 4.</p> |                                        |                              |
| Titanium alloy (Ti-6Al-4V) polished disks evaluated in | Human fibroblasts                                                                                                                                                                                                                                                                                                                                                                                                                      | Cells Morphology at 24 hrs | Larger, flatter and more spread out cells on surfaces coated                                                                                                                                                                                                                                                                                                                                                                                                                                                                                                                                                                                                                                                                                                                                                                                         | Fn coatings exert a positive effect on | Chimutengwende-Gordon, 2011* |

|                                                                                                                                                                                                                                                                                                                                                                                                                                                                                                                                                                                         |                                                                                                   |                                                                                                                                                                         |                                                                                                                                                                                                                                                                                                                                                                                                                                                                                                                                                                                                                                           |                                                                                                                                                                                                                      |                    |
|-----------------------------------------------------------------------------------------------------------------------------------------------------------------------------------------------------------------------------------------------------------------------------------------------------------------------------------------------------------------------------------------------------------------------------------------------------------------------------------------------------------------------------------------------------------------------------------------|---------------------------------------------------------------------------------------------------|-------------------------------------------------------------------------------------------------------------------------------------------------------------------------|-------------------------------------------------------------------------------------------------------------------------------------------------------------------------------------------------------------------------------------------------------------------------------------------------------------------------------------------------------------------------------------------------------------------------------------------------------------------------------------------------------------------------------------------------------------------------------------------------------------------------------------------|----------------------------------------------------------------------------------------------------------------------------------------------------------------------------------------------------------------------|--------------------|
| <p>10 conditions:</p> <ul style="list-style-type: none"> <li>- polished (Pol);</li> <li>- silanized alone (Si);</li> <li>- passivated for the 2 h period (120 Pass);</li> <li>- passivated for a reduced time period of 5 min (5 Pass);</li> <li>- silanized following passivation for 2 h (120 PassSi);</li> <li>- silanized following passivation for 5 min (5 PassSi);</li> <li>- adsorbed fibronectin (AdFn);</li> <li>- SiFn following 2 h passivation (120 PassSiFn);</li> <li>- SiFn following 5 min passivation (5 PassSiFn) and</li> <li>- SiFn without passivation</li> </ul> | (1BR3G)                                                                                           | <p>Adhesion and area quantification by Immunohistochemistry (anti-vinculin) at 24 hrs</p> <p>Cells Metabolism at 24 hrs</p>                                             | <p>with Fn.</p> <p>Cells on Si ↑spread out vs Pol discs.</p> <p>↑ filopodia on AdFn, SiFn and 5 PassSiFn and cell–cell interactions vs 120 PassSiFn and control discs.</p> <p>↓ fewer, smaller and low adhesion on passivated surfaces for 24 hrs.</p> <p>↓ adhesion plaques for cells on passivated and silanized surfaces vs SiFn.</p> <p>↑ vinculin markers for SiFn vs 5 PassSiFn and 120 PassSiFn and polished disks.</p> <p>↑ adhesion when Fn is present, irrespective of the silanized, adsorbed or passivated surfaces.</p> <p>↑ cells size and vinculin markers on the Fn-coated substrates irrespective of coating regime.</p> | <p>fibroblast adhesion.</p> <p>Passivation is detrimental to fibroblast adhesion even for short periods of time</p> <p>Fn coating overcome the negative effect of passivation and or silanization on wettability</p> |                    |
| <p>Ti coated glass silanized with different agents with nano-keratin coatings extracted from human hair fibers:</p> <ul style="list-style-type: none"> <li>- keratose (KOS)</li> <li>- Kerateine (KTN)</li> </ul> <p>Or with</p> <ul style="list-style-type: none"> <li>- Fibronectin (FN)</li> </ul>                                                                                                                                                                                                                                                                                   | <p>Human neonatal primary dermal fibroblast (PCS-201-010) and human keratinocytes HaCaT cells</p> | <p>Focal adhesion immunocytochemistry at 30 min, 1 and 3 hrs</p> <p>Detection of smooth muscle actin (SMA) in fibroblast at 3 hrs</p> <p>Detection of involucrin in</p> | <p>Rounded shape on all substrates at 30 min for fibroblast</p> <p>Flattened morphology and enlargement at 1 hr for FN, and spreading and filopodia for KTN substrate.</p>                                                                                                                                                                                                                                                                                                                                                                                                                                                                | <p>Keratin seem to represent an attractive biomimetic coating (simulating human fingernail) for the percutaneous component</p>                                                                                       | <p>Trent, 2019</p> |

|                                                                                                                                                                                                                                                                                                                                                        |                                                      |                                                                                                                                                                |                                                                                                                                                                                                                                                                                                                                                                 |                                                                                                                                    |                          |
|--------------------------------------------------------------------------------------------------------------------------------------------------------------------------------------------------------------------------------------------------------------------------------------------------------------------------------------------------------|------------------------------------------------------|----------------------------------------------------------------------------------------------------------------------------------------------------------------|-----------------------------------------------------------------------------------------------------------------------------------------------------------------------------------------------------------------------------------------------------------------------------------------------------------------------------------------------------------------|------------------------------------------------------------------------------------------------------------------------------------|--------------------------|
| <ul style="list-style-type: none"> <li>- Collagen type I</li> <li>- Plain titanium (pTi)</li> </ul>                                                                                                                                                                                                                                                    |                                                      | <p>HaCaTs at 3 hrs, 1 and 7 days</p>                                                                                                                           | <p>Branched morphology on KOS and KTN substrates vs polygonal shape on pTi, and aFN</p> <p>Good adhesion for HaCaT cells to all substrates with branched filopodia on the keratin substrates.</p> <p>Slight staining for SMA in fibroblasts on all substrates at all times points.</p> <p>↑ positive staining for involucrin in HaCaT cells on KTN and KOS.</p> |                                                                                                                                    |                          |
| <p>Polished surgical grade Ti alloy (Ti-6Al-4V) used as controls (Pol) in comparison with non-Fn-functionalized sintered HA discs (HA) and HA-Fn functionalization (HAFn)</p>                                                                                                                                                                          | <p>Human dermal fibroblasts (1BR3G)</p>              | <p>Focal adhesion at 1, 4 and 24 hrs</p> <p>Cell area quantification at 1 4 and 24 hrs</p>                                                                     | <p>↑ Focal adhesion on HAFn vs HA and Pol controls at all time-points.</p> <p>↑ Cell area at 1 and 4 hrs on HA &lt; Pol &lt; HAFn, at 24 hrs the cell areas on HAFn and Pol were significantly greater than on HA.</p> <p>↑ Attachment on HAFn than on HA at four and 24 hrs</p>                                                                                | <p>Fn-coated HA implants may improve dermal tissue adhesion in osteointegrated implant</p>                                         | <p>Pendegrass, 2012a</p> |
| <p>Ground and polished Ti alloy with a surface roughness of about 0.03 Ra, with different surface configurations:</p> <ul style="list-style-type: none"> <li>- polished discs (Pol),</li> <li>- polished discs with absorbed fibronectin (AdFn),</li> <li>- polished disc which were silanized (Si) and</li> <li>- polished discs that were</li> </ul> | <p>Immortalized Human dermal fibroblasts (1BR3G)</p> | <p>Focal adhesion (FA) immunolocalization at 1, 4, 24, and 96 hrs.</p> <p>Cell areas, vinculin counts at 1,4, 24 and 96 hrs</p> <p>Shear stress for 24 hrs</p> | <p>↑ Shear stress and FA density between 1 and 24 hrs for Pol</p> <p>↓ Shear stress between time points but no significant differences in FA density for AdFN and SiFn.</p> <p>↑ cell area between time points for AdFN and SiFn.</p>                                                                                                                           | <p>Dermal fibroblast attachment strength is significantly improved by fibronectin coating in comparison with uncoated Titanium</p> | <p>Pendegrass, 2010</p>  |

|                                                                                              |                                                                               |                                                                                                                                                     |                                                                                                                                                                                                                                                                                                                                                                                                                                                                                                                                                                                                                                                                                                                                                                                                                    |                                                                                                                                           |                    |
|----------------------------------------------------------------------------------------------|-------------------------------------------------------------------------------|-----------------------------------------------------------------------------------------------------------------------------------------------------|--------------------------------------------------------------------------------------------------------------------------------------------------------------------------------------------------------------------------------------------------------------------------------------------------------------------------------------------------------------------------------------------------------------------------------------------------------------------------------------------------------------------------------------------------------------------------------------------------------------------------------------------------------------------------------------------------------------------------------------------------------------------------------------------------------------------|-------------------------------------------------------------------------------------------------------------------------------------------|--------------------|
| <p>silanized and treated with fibronectin (SiFn).</p>                                        |                                                                               |                                                                                                                                                     | <p>↑ Shear stress and FA density significantly increased between 1 and 24 hrs for Si</p> <p>At 1 hour:<br/>         ↑shear stress and FA density for adsorbed Fn substrates vs uncoated control (Pol vs. AdFn and Si vs SiFn).<br/>         ↑ Shear stress for SiFn vs AdFn.<br/>         ↑ Cell area for AdFn vs SiFn</p> <p>At 4 hours:<br/>         ↑shear stress for adsorbed Fn substrates vs uncoated controls (Pol vs. AdFn and Si vs. SiFn),<br/>         ↑ Cell areas on Fn-coated substrates vs uncoated controls (Pol vs. AdFn and Si vs SiFn).</p> <p>At 24 hours:<br/>         ↑ shear stress and FA density on adsorbed Fn substrates vs uncoated controls (Shear stress: Pol vs AdFn and Si vs. SiFn; FA density: Pol vs. and Si vs SiFn).<br/>         ↑ FA density and cells for AdFn vs SiFn</p> |                                                                                                                                           |                    |
| <p>Anodization process used to realize Ti nanotube in comparison to Ti control substrate</p> | <p>Human dermal fibroblasts (HDF) and human epidermal keratinocytes (HEK)</p> | <p>Adhesion, proliferation and viability at 1, 2 and 4 days</p> <p>Cells morphology, cytoskeletal reorganization and differentiation at 4 days.</p> | <p>↑ adhesion and proliferation of HDF on Ti nanotubes after 4 days</p> <p>↓ adhesion and proliferation of HEK on Ti nanotubes after 4 days</p>                                                                                                                                                                                                                                                                                                                                                                                                                                                                                                                                                                                                                                                                    | <p>Ti nanotube provide a favorable surface for adhesion and proliferation of HDF cells.</p> <p>This surface prevents HEK adhesion and</p> | <p>Smith, 2011</p> |

|                                                                                                                                                                                                                                        |                            |                                                                                                                       |                                                                                                                                                                                                                                                                                                                                                                                                                                                                                                                                                                                                                                  |                                                                                                   |            |
|----------------------------------------------------------------------------------------------------------------------------------------------------------------------------------------------------------------------------------------|----------------------------|-----------------------------------------------------------------------------------------------------------------------|----------------------------------------------------------------------------------------------------------------------------------------------------------------------------------------------------------------------------------------------------------------------------------------------------------------------------------------------------------------------------------------------------------------------------------------------------------------------------------------------------------------------------------------------------------------------------------------------------------------------------------|---------------------------------------------------------------------------------------------------|------------|
|                                                                                                                                                                                                                                        |                            |                                                                                                                       | <p>40% increase of HDF on Ti nanotube surface coverage and a 92% decrease in HEK cell coverage vs control substrate.</p> <p>↑ alignment of HDF cells on Ti nanotube arrays vs control substrate.</p> <p>↑ HDF viability after 4 days on nanotubes vs control substrate.</p> <p>↓ HEK viability on Ti nanotube vs control substrate.</p> <p>↑ expression of vinculin and F-actin by HDF cells, while minimal expression for HEK cells.</p> <p>↑ expression of collagen Ia1 and fibrillin 1 for HDF cells on Ti nanotube arrays.</p> <p>↓ expression of cytokeratin 19 and laminin b3 for HEK cells on Ti nanotube vs control.</p> | proliferation, restricting the downgrowth along the implanted biomaterial.                        |            |
| <p>Chitosan mixed with chitosan/poly(ethylene oxide) (PEO) at 75:25 ratio with the addition to the polymer of 0.1, 1 and 5 wt% of AgNO<sub>3</sub>. Nanofibrous membrane were post loaded with 20, 40,60 ug of CHX (chlorhexidine)</p> | Human foreskin fibroblasts | <p>Citotoxicity at 24 hrs</p> <p>Antibacterial effects with S.aureus for 20 hrs after 1,2,3 and 4 days of loading</p> | <p>Cytotoxicity for membranes containing ≥60 µg of CHX. No cytotoxic effect for membranes loaded with 20 µg CHX or with AgNO<sub>3</sub>.</p> <p>No cytotoxic for AgNO<sub>3</sub> up to the highest concentration tested (50 µg/ml),</p> <p>Inhibition zone for AgNO<sub>3</sub> of 1 and 5 wt% and for membranes</p>                                                                                                                                                                                                                                                                                                           | The membranes have a potential to act as an active antibacterial dressing for percutaneous device | Song, 2016 |



|                                                                                                                                                                                                                                                                                                                                                                                                                                                                                                                                                                                        |                                  |                                                                                                                                                                   |                                                                                                                                                                                                                                                                                                                                                                                                                                                                                                                                                                                                                                                                                                                                                                                  |                                                                                                                                                                                                                                                                                        |                             |
|----------------------------------------------------------------------------------------------------------------------------------------------------------------------------------------------------------------------------------------------------------------------------------------------------------------------------------------------------------------------------------------------------------------------------------------------------------------------------------------------------------------------------------------------------------------------------------------|----------------------------------|-------------------------------------------------------------------------------------------------------------------------------------------------------------------|----------------------------------------------------------------------------------------------------------------------------------------------------------------------------------------------------------------------------------------------------------------------------------------------------------------------------------------------------------------------------------------------------------------------------------------------------------------------------------------------------------------------------------------------------------------------------------------------------------------------------------------------------------------------------------------------------------------------------------------------------------------------------------|----------------------------------------------------------------------------------------------------------------------------------------------------------------------------------------------------------------------------------------------------------------------------------------|-----------------------------|
|                                                                                                                                                                                                                                                                                                                                                                                                                                                                                                                                                                                        |                                  |                                                                                                                                                                   | loaded with 20 µg CHX and 60 µg CHX.                                                                                                                                                                                                                                                                                                                                                                                                                                                                                                                                                                                                                                                                                                                                             |                                                                                                                                                                                                                                                                                        |                             |
| <p>Ti alloy (Ti6Al4V) disks with surface coatings:</p> <ul style="list-style-type: none"> <li>- uncoated polished Ti6Al4V (Pol),</li> <li>- Hydroxyapatite (HA) electrochemical deposited</li> <li>- Hydroxyapatite and fibronectin (HAFn),</li> <li>- Hydroxyapatite with silver (HAAg) at 10, 50 and 100 mg of AgNO<sub>3</sub> (HAAg10, HAAg50 and HAAg100)</li> <li>- Hydroxyapatite with silver and fibronectin (HAAgFn10, HAAgFn50 and HAAgFn100).</li> </ul> <p>All surfaces were studied before and after preconditioning by immersion in fetal calf serum for 24 h (P24).</p> | Human dermal fibroblasts (1BR3G) | <p>Live/dead at 24 hrs</p> <p>Cells Metabolism at 24 hrs</p> <p>Biofilm formation at 24 hrs with S Aureus.</p> <p>Planktonic colony count at 24 hrs S Aureus.</p> | <p>All non-preconditioned HAAg surfaces were cytotoxic to fibroblasts vs to Pol, HA, and HAFn</p> <p>↑ cytotoxicity for HAAg100 and HAAgFn100 vs HAAg50 and HAAg10.</p> <p>After 24 h preconditioning, all surfaces were cytocompatible.</p> <p>↑ cell metabolism on HAFn vs Pol.</p> <p>↓ cell metabolism on HAAg surfaces not preconditioned vs Pol, HA, and HAFn surfaces.</p> <p>↓ cell metabolism on HAAg100 surfaces vs HAAg50 and HAAg10 surfaces.</p> <p>No difference in cell metabolism between HAAg10, HAAg50, and HAAg100 surfaces after preconditioning and no difference between these surfaces and Pol and HA controls.</p> <p>↑ cell metabolism on HAFn controls than on HAAg (P24) surfaces.</p> <p>↑ bacteria within biofilms on HA compared to Pol and on</p> | <p>HAAg100 and HAAgFn100 suppressed bacterial colonization before and after preconditioning</p> <p>After preconditioning, all silver containing surfaces were cytocompatible and supported the growth of fibroblasts.</p> <p>Cell metabolism also increased after preconditioning,</p> | Chimutengwende-Gordon, 2014 |

|                                                                                                                                           |                                          |                                                                                                                           |                                                                                                                                                                                                                                                                                                                                                                                                                                                                                                                                                                                                                                                                                                                                                                                                                          |                                                                                                            |                      |
|-------------------------------------------------------------------------------------------------------------------------------------------|------------------------------------------|---------------------------------------------------------------------------------------------------------------------------|--------------------------------------------------------------------------------------------------------------------------------------------------------------------------------------------------------------------------------------------------------------------------------------------------------------------------------------------------------------------------------------------------------------------------------------------------------------------------------------------------------------------------------------------------------------------------------------------------------------------------------------------------------------------------------------------------------------------------------------------------------------------------------------------------------------------------|------------------------------------------------------------------------------------------------------------|----------------------|
|                                                                                                                                           |                                          |                                                                                                                           | <p>HAFn in comparison to HA.</p> <p>↓ bacterial colonization on nonpreconditioned HAAg in comparison to Pol, HA, and HAFn. Increasing the silver content increased the degree of antibacterial activity.</p> <p>After preconditioning, HAAg10 and HAAg50 lost their antibacterial activity compared to Pol, but fewer bacteria colonized these surfaces than HA.</p> <p>Reduced numbers of bacteria colonized Pol, HA, and HAFn surfaces after preconditioned while increased numbers of bacteria colonized HAAg and HAAgFn surfaces after they were preconditioned.</p> <p>HAAg100 maintained an antibacterial effect after preconditioning compared to Pol.</p> <p>↑ antibacterial activity for HAAg100 and HAAgFn100 compared to control surfaces before and after serum-preconditioning in planktonic condition.</p> |                                                                                                            |                      |
| <p>Ti samples (TiAl6V4) coated with different nanometer copolymers films (Dimethyl(2-hydroxyethyl) phosphonate, 4-vinylpyridine (VP);</p> | <p>Human dermal fibroblasts (HDFibs)</p> | <p>Viability, number of attached cells onto surfaces at 24 and 72 hrs</p> <p>Cells morphology by SEM at 24 and 72 hrs</p> | <p>No significant differences in proliferation among copolymers and control</p> <p>Cell morphology on copolymers was comparable to</p>                                                                                                                                                                                                                                                                                                                                                                                                                                                                                                                                                                                                                                                                                   | <p>A balance between antibacterial activity and biocompatibility for HDFibs was founded in copolymer D</p> | <p>Callies, 2012</p> |

|                                                                                                                                                                                                                                                                                 |                                                                        |                                                                                                                                                                                                |                                                                                                                                                                                                                                                                                                                                                                                                                                                                                                                                   |                                                                                                                                                                                                                                                                                                                                                                                                              |                      |
|---------------------------------------------------------------------------------------------------------------------------------------------------------------------------------------------------------------------------------------------------------------------------------|------------------------------------------------------------------------|------------------------------------------------------------------------------------------------------------------------------------------------------------------------------------------------|-----------------------------------------------------------------------------------------------------------------------------------------------------------------------------------------------------------------------------------------------------------------------------------------------------------------------------------------------------------------------------------------------------------------------------------------------------------------------------------------------------------------------------------|--------------------------------------------------------------------------------------------------------------------------------------------------------------------------------------------------------------------------------------------------------------------------------------------------------------------------------------------------------------------------------------------------------------|----------------------|
| <p>dimethyl(2-methacryloyloxyethyl) phosphonate (DMMEP) and vinylbenzylphosphonate (VBP):</p> <p>A) VP:VBP<br/> B) VP:DMMEP<br/> C) VP:DMMEP<br/> D) VP:DMMEP</p> <p>prepared with free radical polymerization in comparison with titanium control</p>                          |                                                                        | <p>Antimicrobial activity against <i>Staphylococcus epidermidis</i> and <i>Staphylococcus aureus</i> at 1hr.</p>                                                                               | <p>those onto titanium.</p> <p>Copolymer A as well as copolymer B showed a uniform colonization of bacteria on the surface,</p> <p>Copolymer C was more effective from antibacterial point of view while copolymer D showed a reduction up to 95% of bacteria adhesion vs control samples.</p>                                                                                                                                                                                                                                    |                                                                                                                                                                                                                                                                                                                                                                                                              |                      |
| <p>Pellets of:</p> <ul style="list-style-type: none"> <li>- Fluorohydroxyapatites (FHA)</li> <li>- Fluorapatite (FA),</li> <li>- Hydroxyapatite (HA)</li> </ul> <p>at three different sintering temperature (1250 °C - 1050 °C -1150 °C)</p> <p>Ti pellet served as control</p> | <p>HaCaT cells (keratinocytes) and NIH 3T3 murine fibroblast cells</p> | <p>Adhesion study at 2 days;</p> <p>Immunocytochemistry for involucrin to evaluate keratinocytes differentiation</p> <p>Antimicrobial activity with <i>Staphylococcus aureus</i> for 6 hrs</p> | <p>HaCaT adhesion rate:</p> <p>Ti pellets : 92 ± 12%.<br/> HA and FHA (1050 °C) ↓ adhesion than Ti;<br/> HA (1250 °C) ↑ adhesion than Ti; FHA (1250 and 1150 °C) ↔ to HA;<br/> FA ↑ adhesion vs other groups.</p> <p>NIH3T3 adhesion rate:</p> <p>Ti pellet: 415 ± 27%;<br/> HA and FHA (1050 °C) ↓ adhesion than Ti;</p> <p>HA ↑ adhesion than Ti for the other temperature;</p> <p>FHA (1250 and 1150 °C) ↑ adhesion than Ti;</p> <p>FA no differences among sintering temperature</p> <p>↑ expression of involucrin for FA</p> | <p>Results suggested the enhanced ability of FA surfaces to promote terminal differentiation of keratinocytes.</p> <p>Significantly more keratinocytes adhered to the FA surfaces. FHA failed to show a similar improvement in terms of keratinocyte adhesion and proliferation vs Ti or HA surfaces</p> <p>Planktonic form of <i>S. aureus</i> is not affected by the addition of fluoride, and FHA/FA.</p> | <p>Bennett, 2019</p> |

|                                                                                                                                                                               |                                           |                                                                                                                                                                                                                                             |                                                                                                                                                                                                                                                                                                                                                                                                                                                                                                                                                                                                                                                                                                                                                                                                                     |                                                                                                                                                          |                    |
|-------------------------------------------------------------------------------------------------------------------------------------------------------------------------------|-------------------------------------------|---------------------------------------------------------------------------------------------------------------------------------------------------------------------------------------------------------------------------------------------|---------------------------------------------------------------------------------------------------------------------------------------------------------------------------------------------------------------------------------------------------------------------------------------------------------------------------------------------------------------------------------------------------------------------------------------------------------------------------------------------------------------------------------------------------------------------------------------------------------------------------------------------------------------------------------------------------------------------------------------------------------------------------------------------------------------------|----------------------------------------------------------------------------------------------------------------------------------------------------------|--------------------|
|                                                                                                                                                                               |                                           |                                                                                                                                                                                                                                             | <p>at 1250 °C (86 ± 4%), followed by FA at 1150 °C (72 ± 7%), and FA sintered at 1050 °C (67 ± 4%).</p> <p>No significant differences in bacterial adhesion between experimental groups and Ti control</p>                                                                                                                                                                                                                                                                                                                                                                                                                                                                                                                                                                                                          |                                                                                                                                                          |                    |
| <p>Ti plates submitted to micro-arc oxidation (MAO) to obtain coatings with different concentration of Copper (Cu)</p> <p>Cu-free (CA) surfaces and Ti plates as controls</p> | <p>Mouse fibroblast cell line, L-929,</p> | <p>Cells adhesion, proliferation and viability at 1h, 1,3 and 7 days</p> <p>SEM at 1h, 1,3 and 7 days</p> <p>Biochemical analysis at 1, 3 and 7 days</p> <p>In vitro antibacterial tests with <i>S. Aureus</i> at 6, 24, 48 and 96 hrs.</p> | <p>↑ proliferation and viability on all surface at 7 days in the following order: Cu1 ≥ CA ≥ Cu2 ≥ Cu3 ≥ Ti ≥ Cu4.</p> <p>Citotoxicity of Cu4</p> <p>At 7 days the cells grow as layer by layer on Ti, CA, Cu1, Cu2 and Cu3 while on Cu4, the number of cells is ↓ and the morphology collapsed.</p> <p>↑ amounts of Col-I and CTGF at each time point in the following order: Cu4 ≥ Cu3 ≥ Cu2 ≥ Cu1 ≥ CA ≥ Ti.</p> <p>At 7 d of incubation, ↑ amount of α-SMA for Ti, CA and Cu1 indicating that Cu2+ accelerates the fibroblasts switching to a more fibrotic phenotype and differentiating into myofibroblasts.</p> <p>The Cu2+-doped TiO2 surfaces inhibit the attachments of <i>S. aureus</i>; increasing the content of Cu the effect of anti-attachment on <i>S. aureus</i> is increasingly significant.</p> | <p>Microporous TiO2 with an content of Cu2+ (e.g. Cu1) is suitable for cell adhesion and proliferation and able to inhibit <i>S. Aureus</i> adhesion</p> | <p>Zhang, 2016</p> |

|                                                                                                                                                                                                   |                                          |                                                                                                                                                                                                                                              |                                                                                                                                                                                                                                                                                                                                                                                                                                                                                                                                                       |                                                                                                                                             |                    |
|---------------------------------------------------------------------------------------------------------------------------------------------------------------------------------------------------|------------------------------------------|----------------------------------------------------------------------------------------------------------------------------------------------------------------------------------------------------------------------------------------------|-------------------------------------------------------------------------------------------------------------------------------------------------------------------------------------------------------------------------------------------------------------------------------------------------------------------------------------------------------------------------------------------------------------------------------------------------------------------------------------------------------------------------------------------------------|---------------------------------------------------------------------------------------------------------------------------------------------|--------------------|
| <p>Ti plates submitted to MAO and hydrothermal treatment (HT) for 1, 4, 6 and 48 hours (HT1h, HT4h, HT6h and HT48h) vs MAOed, TiO<sub>2</sub> and Ti.</p>                                         | <p>Mouse fibroblast cell line, L-929</p> | <p>Cells adhesion, proliferation and viability at 1h, 1,3 and 7 days</p> <p>SEM at 1h, 1,3 and 7 days</p> <p>Biochemical analysis at 1, 3 and 7 days</p> <p>In vitro antibacterial tests with <i>S. Aureus</i> and <i>E.Coli</i> at 24 h</p> | <p>↑ proliferation and viability on surface at 7 days in the following order: HT4h &gt; HT1h &gt; HT6h &gt; HT48h &gt; As-MAO ed TiO<sub>2</sub> &gt; Ti.</p> <p>After 3 days cells appeared spindle and communicate with their elongated finger-like pseudopodium on all surfaces.</p> <p>↑ amounts of Col-I, CTGF and in α-SMA the following order: HT4h &gt; HT1h &gt; HT6h &gt; As-MAOed TiO<sub>2</sub> &gt; HT48 ≈ Ti.</p> <p>The adhered numbers of bacteria ↓ on coating surfaces in comparison with Ti, especially for <i>S. aureus</i>.</p> | <p>Coatings as HT1h, HT4h could be used for percutaneous implant as increased fibroblast functions and possessed anti-bacterial ability</p> | <p>Zhang, 2017</p> |
| <p>Ti plates submitted to micro-arc oxidation (MAO) to obtain coatings doped with Copper (Cu) and different amount of zinc (CA - Zn0 - Zn1 - Zn2 - Zn3 - Zn4) vs Cu-free (CA) surface and Ti.</p> | <p>Mouse fibroblast cell line, L-929</p> | <p>Cells adhesion, proliferation and viability at 1, 3 and 7 days</p> <p>SEM at 1, 3 and 7 days</p> <p>Biochemical analysis at 1, 3 and 7 days</p> <p>In vitro antibacterial tests with <i>S. Aureus</i> at 6 and 24h.</p>                   | <p>↑ proliferation in the following order: Zn2 &gt; Zn3 &gt; Zn1 &gt; Zn0 &gt; CA &gt; Zn4.</p> <p>↑ viability on all surfaces.</p> <p>↑ adhesion on Zn0–Zn3, especially on Zn2, while ↓ on Zn4.</p> <p>L929 appeared polygonal and spread on CA and Zn0–Zn3.</p> <p>↑ synthesis at 7 d of Col I and CTGF in the following order: Zn3 &gt; Zn2 ≈ Zn0 &gt; Zn1 &gt; CA.</p> <p>CA does not show antibacterial activity.</p> <p>↓ adhesion of <i>S. Aureus</i> on</p>                                                                                   | <p>Doped coating with Cu and Zn0–Zn3 enhance fibroblast viability, and exert an antibacterial effect.</p>                                   | <p>Zhang, 2018</p> |

|                                                                                                                                                                                                                                   |                                   |                                                                                                                                                                                                                                                    |                                                                                                                                                                                                                                                                                                                                                                                                                                                                              |                                                                                                                                       |             |
|-----------------------------------------------------------------------------------------------------------------------------------------------------------------------------------------------------------------------------------|-----------------------------------|----------------------------------------------------------------------------------------------------------------------------------------------------------------------------------------------------------------------------------------------------|------------------------------------------------------------------------------------------------------------------------------------------------------------------------------------------------------------------------------------------------------------------------------------------------------------------------------------------------------------------------------------------------------------------------------------------------------------------------------|---------------------------------------------------------------------------------------------------------------------------------------|-------------|
|                                                                                                                                                                                                                                   |                                   |                                                                                                                                                                                                                                                    | ZnO–Zn3 surfaces at 6 h and a slight increase at 24 h.                                                                                                                                                                                                                                                                                                                                                                                                                       |                                                                                                                                       |             |
| Zirconia (Zr) plates submitted to micro-arc oxidation (MAO) and hydrothermal treatment (HT) for 4, 6, 12 and 24 hours (HT4h, HT6h, HT12h and HT24h) to realized nano-rod structures in comparison to as-MAOed, and Zr control     | Mouse fibroblast cell line, L-929 | Cells adhesion, proliferation and viability at 1h, 1,3 and 7 days<br><br>SEM at 1h, 1,3 and 7 days                                                                                                                                                 | ↑ proliferation in the following order: HT-24 h > as- MAOed ZrO2 > Zr (control).<br><br>HT24h surface covered with cells with dense lamellipodia and filopodia anchored to the HA nanorods                                                                                                                                                                                                                                                                                   | HT resulted in the formation of HA nanorods on the coating surface.<br><br>This HA nanorods improve cells adhesion and proliferation. | Zhang, 2015 |
| Ti disks treated with MAO technique to obtain a surface functionalization with Magnetic Fe3O4 nanoparticles (NPs) at 3 different concentration 0 (CA), 0.25 (FT1), 0.75 (FT2) and 2.25 g L-1 (FT3) vs polished titanium (pol Ti). | Mouse fibroblast cell line, L-929 | Cell viability at 1, 3, and 7 days.<br><br>Cells morphology at 1 and 3 days<br><br>Intracellular quantification of connective tissue growth factor (CTGF) and Col-I at 3, 7 and 14 days<br><br>Antibacterial test with S. aureus at 6 and 24 hours | ↑ cells viability at 1 day on pol Ti and no difference among the NPs coatings.<br><br>↑ cell viability at 3 and 7 days in the following order: FT3 ≥ FT2 ≥ FT1 ≥ CA ≥ pol Ti<br><br>↑ amount of Col-I and CTGF in the following order: FT3 ≥ FT2 ≥ FT1 ≥ CA ≥ pol Ti<br><br>Increase amount of Fe3O4, reduced the number of S. aureus adhered on the coating surfaces with no significant difference,<br><br>Reduction of 60% adherent bacteria on FT3 in comparison with CA | The incorporation of Fe3O4 enhance the viability and proliferation of fibroblast                                                      | Li, 2019*   |
| Ti disks treated with alkali-heat treatment (AHT) followed with hydrothermal treatment (HT) in order to obtain a hydroxyapatite HA nanorod and Si-HA nanorod obtained with the addition of                                        | Mouse fibroblast cell line, L-929 | Cells viability and proliferation at 1, 3 and 7 days<br><br>Molecular expression of α-SMA, CTGF, TGF-β1, and Col-I at 3 and 7 days                                                                                                                 | ↑ cells proliferation at 1 day in the following order: Si-HA > HA > Ti.<br><br>Spherical morphology for cells at 1 day on Ti, while spread morphology was observed on                                                                                                                                                                                                                                                                                                        | Nanorod topography and Si substitution in HA can enhance cells attachment<br><br>HA nanorods especially the Si substituted            | Li, 2020*   |

|                                                                                                                                                                                                             |                                       |                                                                                                                   |                                                                                                                                                                                                                                                                                                  |                                                                                                                                           |                |
|-------------------------------------------------------------------------------------------------------------------------------------------------------------------------------------------------------------|---------------------------------------|-------------------------------------------------------------------------------------------------------------------|--------------------------------------------------------------------------------------------------------------------------------------------------------------------------------------------------------------------------------------------------------------------------------------------------|-------------------------------------------------------------------------------------------------------------------------------------------|----------------|
| Si in the hydrothermal treatment vs polished titanium                                                                                                                                                       |                                       | Extracellular collagen quantification at 3 and 7 days                                                             | HA and especially on Si-HA.<br>↓ cell adhesion on HA at 3 days vs Si-HA and Ti<br><br>↑ gene expression on each surface in the following order: Si-HA > HA > Ti.<br><br>Collagen secretion in the order: Si-HA > HA > Ti from 3 to 7 days.                                                       | improved functional expression of fibroblasts.<br><br>The combined effect of Ca and Si ions and HA nanotopography enhanced cell response. |                |
| Ethylene–vinyl alcohol copolymer (EVOH) plate coated with a liquid-phase coating process with a solution of calcium phosphate supplemented with 0, 4, 10 and 20 µg mL <sup>-1</sup> of FGF-2.               | Fibroblast like NIH3T3 cells          | Cells proliferation at 72 hours                                                                                   | ↑ cells density and dimension with F4 and F10 vs F0<br><br>Spindle shape and presence of pseudopodia for fibroblast cultured with F4 and F10.                                                                                                                                                    | Coating able to promote fibroblast proliferation                                                                                          | Sasaki, 2010*  |
| Sintered porous Ti rods (Ti6Al4V ELI) with pore sizes 40 – 100 µm, and porosity 45±5%, with a nanotubular surface realized with anodization process in comparison with un modified surface                  | Fibroblast obtained from rabbit derma | Morphology at 5, 10 and 15 days                                                                                   | No differences in cell morphology vs unmodified titanium at 5 days.<br><br>↑ Cellular density after the 15 <sup>th</sup> day of incubation with well spread fibroblasts with large bundles on nanotubular Ti<br><br>No significant increase in cellular density on unmodified surface at 15 days | The anodization and the realization of a nanotubular structure increased the cellular density                                             | Shevtsov, 2016 |
| Silanized Ti6Al4V discs functionalized with iodinated laminin-332 in comparison with:<br>- not silanized iodinated laminin 332 (adsorbed group);<br>- polished titanium (control);<br>- silanized titanium. | HaCaT keratinocytes cells             | Proliferation at 24 hours<br><br>Focal Adhesion detection at 24 hours<br><br>Cell area quantification at 24 hours | No difference in proliferation between control, adsorbed, or L-332-Ti6Al4V discs at 24 h.<br><br>↓ of 22–25% of proliferation for silanized titanium vs the other surfaces<br><br>Cell area of HaCat onto                                                                                        | Silanized surface functionalized with L332 promoted more strongly the cell adhesion to Ti6Al4V                                            | Gordon, 2010   |

|                                                                                                                                                                                 |                                                   |                                                                                                                                                                                                                     |                                                                                                                                                                                                                                                                                                                                                                                                                           |                                                                                                                                                                       |                      |
|---------------------------------------------------------------------------------------------------------------------------------------------------------------------------------|---------------------------------------------------|---------------------------------------------------------------------------------------------------------------------------------------------------------------------------------------------------------------------|---------------------------------------------------------------------------------------------------------------------------------------------------------------------------------------------------------------------------------------------------------------------------------------------------------------------------------------------------------------------------------------------------------------------------|-----------------------------------------------------------------------------------------------------------------------------------------------------------------------|----------------------|
|                                                                                                                                                                                 |                                                   |                                                                                                                                                                                                                     | <p>silanized L332 was smaller vs the other surfaces.</p> <p>↑ Focal adhesion expression for silanized L332 vs the control group (more 20%).</p> <p>↓ vinculin plaques for HaCaTs on silanized control discs while<br/>↑ plaques for adsorbed discs.</p>                                                                                                                                                                   |                                                                                                                                                                       |                      |
| <p>Nanotubular Titanium realized with anodization and nanorough titanium (Ti) substrates realized with electron beam evaporation in comparison with unmodified surfaces.</p>    | <p>Commercially available human keratinocytes</p> | <p>Cells adhesion at 4 hours</p> <p>Cells proliferation at 1, 3 and 5 days</p> <p>Cells morphology at 4hrs, 1,3 and 5 days</p>                                                                                      | <p>↑ cells adhesion on nanotubular and nanorough Ti vs unmodified Ti after 4 h. No significant difference between the nanotextured substrates</p> <p>↑ cell proliferation on nanorough Ti vs unmodified Ti.</p> <p>Unmodified Ti promoted keratinocyte proliferation vs nanotubular Ti.</p> <p>↑ cells spreading on nanotubular and nanorough Ti substrates with more extended filopodia vs unmodified Ti substrates.</p> | <p>Keratinocyte adhesion was favored by the Ti substrates with nanotextured features</p>                                                                              | <p>Puckett, 2010</p> |
| <p>Chitosan-Polyethylene glycol (CS_PEG) membranes with incorporated three concentrations of silver (Ag) coded as silver nanocluster AgNC0.1, Ag AgNC 0.5, and Ag AgNC 1.0.</p> | <p>Human skin keratinocytes A341 cell lines</p>   | <p>Cells viability at 24 hours</p> <p>Cell Adhesion and Proliferation at 24 hours</p> <p>Antibacterial activity (overnight) and growth inhibition test (24 hrs) with Escherichia coli and Staphylococcus aureus</p> | <p>Antibacterial activity against both bacteria for AgNCs, with increasing activity as a function of AgNCs concentration.</p> <p>No microbial growth for Ag1.0</p> <p>Absence of cytotoxicity for CS-PEG and AgNCs.</p> <p>↑ cells adhesion and</p>                                                                                                                                                                       | <p>The silver contents inhibit biofilm formation and stimulate cell viability and adhesion.</p> <p>AgNCs impregnated membranes are promising percutaneous devices</p> | <p>Mishra, 2016</p>  |



|                                                                                                                                                                                                                                                          |                                        |                                                                                                                                                         |                                                                                                                                                                                                                                                                                                             |                                                                                                                                                                                                                                                                                                                                  |                   |
|----------------------------------------------------------------------------------------------------------------------------------------------------------------------------------------------------------------------------------------------------------|----------------------------------------|---------------------------------------------------------------------------------------------------------------------------------------------------------|-------------------------------------------------------------------------------------------------------------------------------------------------------------------------------------------------------------------------------------------------------------------------------------------------------------|----------------------------------------------------------------------------------------------------------------------------------------------------------------------------------------------------------------------------------------------------------------------------------------------------------------------------------|-------------------|
|                                                                                                                                                                                                                                                          |                                        |                                                                                                                                                         | proliferation on AgNCs membranes ~1.8 times higher vs to chitosan alone.                                                                                                                                                                                                                                    |                                                                                                                                                                                                                                                                                                                                  |                   |
| Microwave plasma chemical vapor used to deposit ultrananocrystalline diamond (UNCD) thin films (150 nm) on microporous silicon nitride membranes with an array of 100 x 100 2.5 µm diameter pores with a high-density hexagonal layout and 4.5 µm pitch. | neonatal human epidermal keratinocytes | Cells viability at 24 hrs                                                                                                                               | ↑ viability on the silicon nitride membranes and on UNCD-coated silicon nitride membranes vs coverslip control and the well control.                                                                                                                                                                        | Potential use of the UNCD coating to improve the skin sealing                                                                                                                                                                                                                                                                    | Skoog, 2012       |
| Ti foils submitted to anodization to produce nanotube array and nanorough surface by means Temscal Electron Beam Evaporator vs conventional titanium surface (nano-smooth).<br><br>All surfaces were functionalized with FGF-2                           | Keratinocytes                          | Cell density at 1 and 5 days                                                                                                                            | ↑ cell density onto both nanostructured surfaces vs conventional Ti at both time points<br><br>↑ density onto nanostructured functionalized surfaces with FG2 vs no functionalized surfaces<br><br>Comparable cells density among nanostructure surfaces and conventional titanium functionalized with FGF2 | Immobilization of FGF-2 seems to increase keratinocyte density<br><br>Nanorough and nanotubular Ti surfaces promoted keratinocyte density in comparison to nanosmooth titanium<br><br>Anodization or electron beam evaporation confer nanostructured features that promote keratinocyte function (even without the use of FGF-2) | Zile, 2011a       |
| Surgical grade ground and polished Tialloy (Ti6V4Al) coated with different concentration (5, 10, 15, 20, or 30 ug/mL) of the extracellular domain of E-cadherin (F-ECD) or with different concentration of short peptide containing fifth                | Murine keratinocytes (FSK 7.1 ECACC)   | Adherens junction quantification and analysis.<br><br>Focal contact quantification and analysis<br><br>Cell metabolism<br><br>End point: 4, 12, 24, 48, | No significant differences for the 5-ECD in comparison with control substrates for the parameters<br><br>24 hours:<br>↑ intensity of beta-catenin between 10 and 15 ug/mL of E-cadherin and no significant                                                                                                  | The adsorption of 15 ug/mL of the F-ECD E-cadherin significantly increases metabolic activity, cell area and attachment of murine keratinocytes in vitro.                                                                                                                                                                        | Pendegrass, 2012b |

|                                                               |  |                 |                                                                                                                                                                                                                                                                                                                                                                                                                                                                                                                                                                                                                                                                                                                                                                                                                                                                                                                                                                                            |  |  |
|---------------------------------------------------------------|--|-----------------|--------------------------------------------------------------------------------------------------------------------------------------------------------------------------------------------------------------------------------------------------------------------------------------------------------------------------------------------------------------------------------------------------------------------------------------------------------------------------------------------------------------------------------------------------------------------------------------------------------------------------------------------------------------------------------------------------------------------------------------------------------------------------------------------------------------------------------------------------------------------------------------------------------------------------------------------------------------------------------------------|--|--|
| <p>domain of the F-ECD (5-ECD) vs uncoated polished disks</p> |  | <p>and 72 h</p> | <p>differences for higher concentrations or between uncoated and 5 ug/ml at 24 and 48 hours</p> <p>↑ vinculin count with 5 ug/mL of E-cadherin vs uncoated controls but no significant increase for the higher concentrations at 24 and 48 hours</p> <p>No significant differences in cell area at 24 hours while at 48 hours cell area increased with increasing E-cadherin concentration up to 15 ug/mL.</p> <p>No differences in vinculin density among the concentration tested at 24 and 48 hours</p> <p>↑ significant increase for metabolic activity between 20 and 30 ug/mL at 24 hours while at 48 hours between 5 and 10 ug/mL</p> <p>Study with only 15ug/mL:<br/>         ↑ b-catenin intensity on coated E-cadherin substrates vs uncoated. No differences in metabolic activity, vinculin count, cell area, or vinculin density at 4 hours</p> <p>↑ b-catenin intensity, metabolic activity, vinculin count, cell area at 12 and 24 h on E-cadherin coated substrates vs</p> |  |  |
|---------------------------------------------------------------|--|-----------------|--------------------------------------------------------------------------------------------------------------------------------------------------------------------------------------------------------------------------------------------------------------------------------------------------------------------------------------------------------------------------------------------------------------------------------------------------------------------------------------------------------------------------------------------------------------------------------------------------------------------------------------------------------------------------------------------------------------------------------------------------------------------------------------------------------------------------------------------------------------------------------------------------------------------------------------------------------------------------------------------|--|--|

|  |  |  |                                                                                                                                                                                                                                                                                            |  |  |
|--|--|--|--------------------------------------------------------------------------------------------------------------------------------------------------------------------------------------------------------------------------------------------------------------------------------------------|--|--|
|  |  |  | uncoated controls<br><br>↑ b-catenin intensity, vinculin counts and cell area on E-cadherin coated substrates vs uncoated controls. No difference in metabolic activity at 48 and 72 hours).<br><br>↓ Vinculin density on coated substrates at both time points but significant at 48hours |  |  |
|--|--|--|--------------------------------------------------------------------------------------------------------------------------------------------------------------------------------------------------------------------------------------------------------------------------------------------|--|--|

ABBREVIATIONS:

Titanium = Ti; Poly(2-hydroxyethyl methacrylate = PHEMA; Nylon 6 = N6; Nylon12 = N12; Polycaprolactone = PCL; Poly(methyl methacrylate = PMMA; Poly(D,L-lactic acid = PDLLA; Human gingival epithelial cells = HGEs; Human gingival fibroblasts = HGFs; Alkali Heat = AH; Polydopamine = PDA; Hydroxyapatite = HA; Carboxymethyl chitosan = CMCS; Human Dermal Fibroblast = HDF; Melt electrowriting = MEW; Titania Nano-Tubes = TNT; Polished Ti = pTi; Polished = Pol; Silanized = Si;
